# Supplementary material for: One-step synthesis of hollow Cr(OH)3micro/nano-hexagonal pellets and the catalytic properties of hollow Cr2O3structures
Source: Royal Society of Chemistry journal article supplement (doi:10.1039/c4ta00999a), 2014-05-29
Supplement: c4ta00999a1.pdf [file c4ta00999a1.pdf]

## Supporting Information

### One-step synthesis of hollow $\text{Cr}(\text{OH})_3$ micro/nano hexagonal pellets and the catalysis properties of hollow $\text{Cr}_2\text{O}_3$ structure

Y.K. Bai <sup>1,3</sup>, R.T. Zheng <sup>1,\*</sup>, Q.Gu <sup>1</sup>, J.J. Wang <sup>2</sup>, B.S.Wang <sup>1</sup>, G.A. Cheng <sup>1</sup> and G. Chen <sup>2</sup>

<sup>1</sup>Key Laboratory of Radiation Beam Technology and Materials Modification of Ministry of Education, College of Nuclear Science and Technology, Beijing Normal University, Beijing 100875, P. R. China

<sup>2</sup>Department of Mechanical Engineering, Massachusetts Institute of Technology, 77 Massachusetts Avenue, Cambridge, Massachusetts 02139, USA

<sup>3</sup>Key Laboratory of Advanced Materials sponsored by the Ministry of Education of China, School of Materials Science and Engineering, Tsinghua University, Beijing 100084, P. R. China

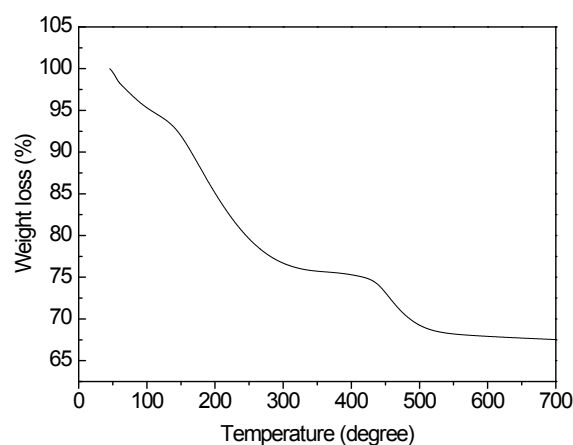

**Figure S1** the TGA (thermal gravimetric analysis) curve of as-prepared product from Room Temperature to 700 °C

---

\* Correspondence and requests for materials should be addressed to R.T. Zheng ([rtzheng@bnu.edu.cn](mailto:rtzheng@bnu.edu.cn)).

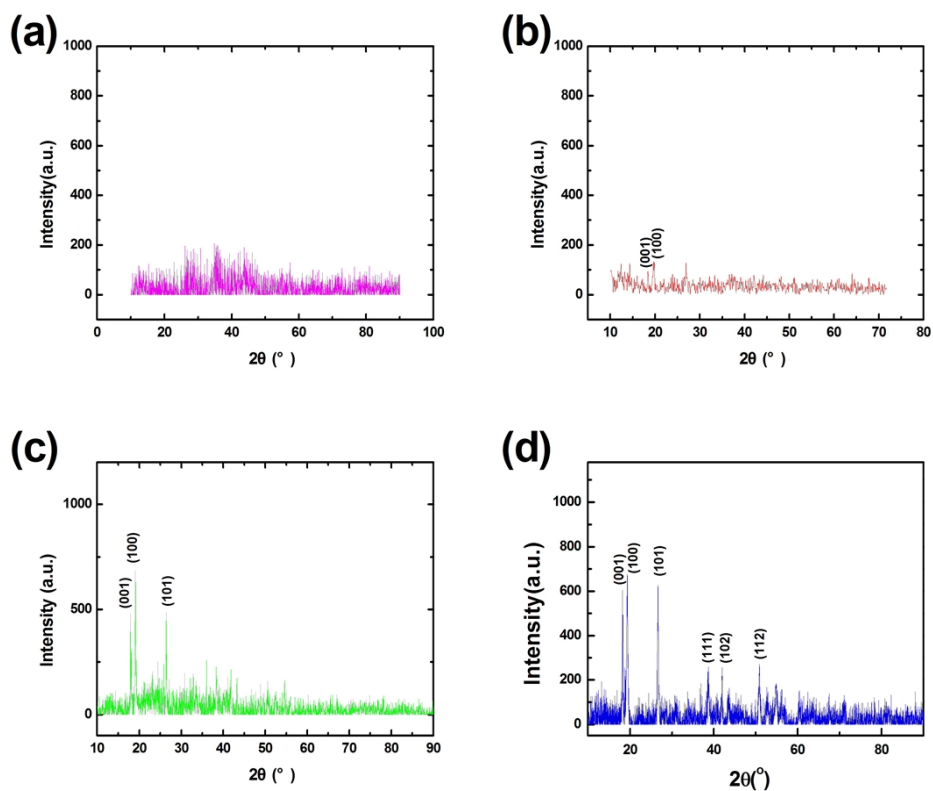

**Figure S2** XRD patterns of the products after different time of reaction. (a)1 second, (b)15 seconds, (c)1 day ,(d)5 days

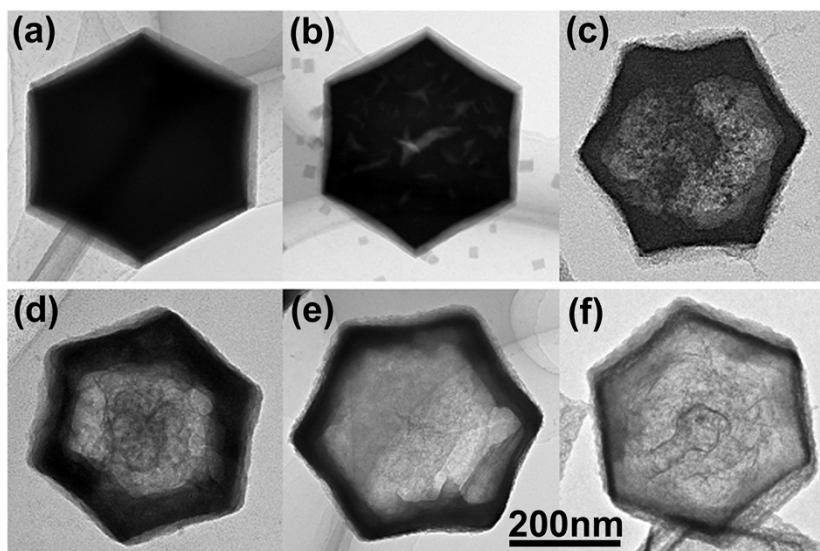

**Figure S3** TEM images of  $\text{Cr(OH)}_3$  hexagonal pellets after different reaction times. (a)0.5day, (b)1 day, (c)2days, (d)3 days, (e)4 days, (f)5days.

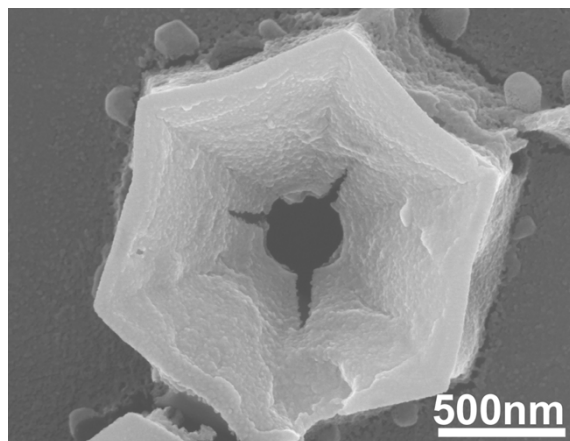

**Figure S4** SEM images of Cr (OH)<sub>3</sub> product.

The product was obtained by the reaction of a 50 ml 5.6 mM CrCl<sub>3</sub> solution and a 50 ml 16.8 mM NaBH<sub>4</sub> solution for a day, two drops of 0.1M hydrochloric acid were added into the solution after an hour of reaction.

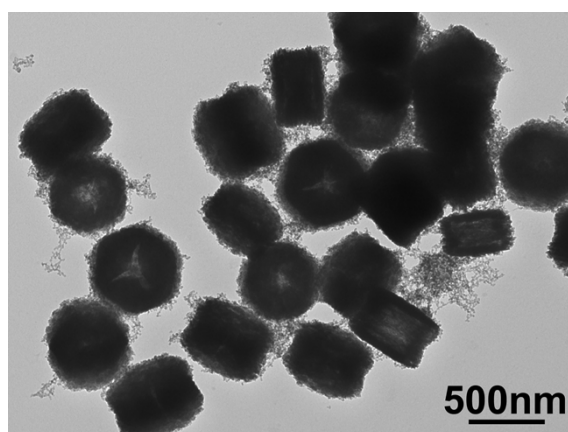

**Figure S5** TEM image of hollow Cr(OH)<sub>3</sub> hexagonal pellet prepared by the reaction of 50 ml 10 mM CrCl<sub>3</sub> solution and 0.064g NaBH<sub>4</sub>(solid) for 12 hours

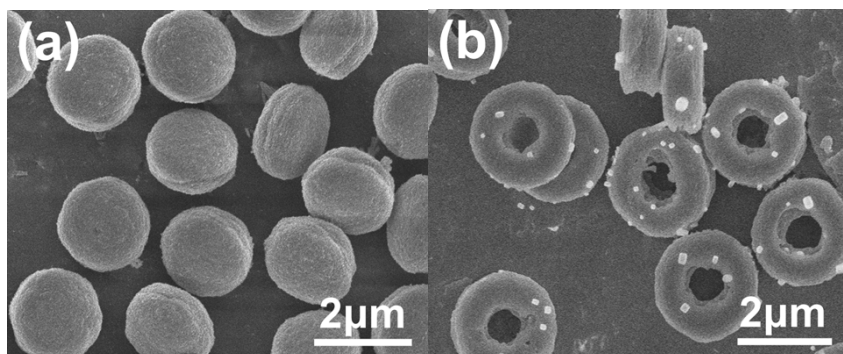

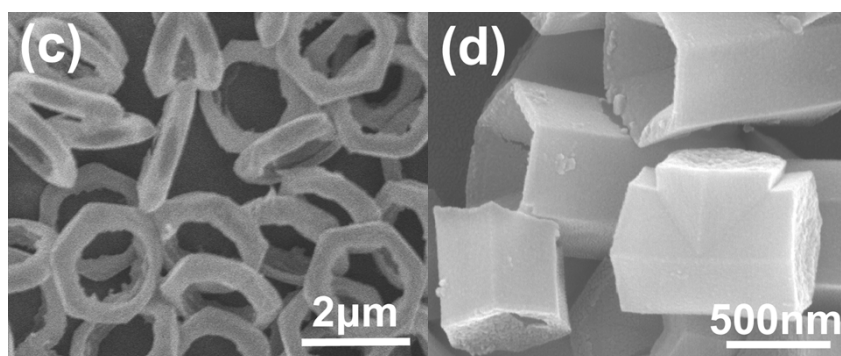

**Figure S6** Cr(OH)<sub>3</sub> micro/nano structures obtained by the similar synthesis strategy  
 (a) 50 ml 20 mM CrCl<sub>3</sub> solution react with 50 ml 50 mM NaBH<sub>4</sub> solution for an hour,  
 (b) 50 ml 20 mM CrCl<sub>3</sub> solution react with 50 ml 40 mM NaBH<sub>4</sub> solution for an hour,  
 (c) 50 ml 33 mM Cr(NO<sub>3</sub>)<sub>3</sub> solution react with 50 ml 50 mM NaBH<sub>4</sub> solution for an hour,  
 (d) 50 ml 5.6 mM CrCl<sub>3</sub> solution react with 0.096g NaBH<sub>4</sub> (solid) for 3 days

Since the direct dehydrogenation data is also important for studying the dehydrogenation of alkanes, a control experiment that without CO<sub>2</sub> was tested for comparison (Fig. S7). The direct dehydrogenation were carried out in the same fixed-bed flow type quartz reactor packed with 0.15 g of the catalyst and 1 g of quartz sand at atmospheric pressure, the average height of catalyst pellets is 212 nm. The reactant stream consisting of 20 % isobutane and 80 % Ar was introduced into the reactor at a flow rate of 2000 mL/(h•g). The reaction temperature varied from 823 K to 973 K.

It can be found that isobutane conversion in oxidative dehydrogenation (ODH) reactions is higher than that in direct dehydrogenation (DH) reactions from 823K to 943K. Isobutene selectivity in ODH is also higher than that in DH when the reaction temperature higher than 853K. The results indicate that oxidative dehydrogenation is more efficiency than direct dehydrogenation over the similar catalyst.

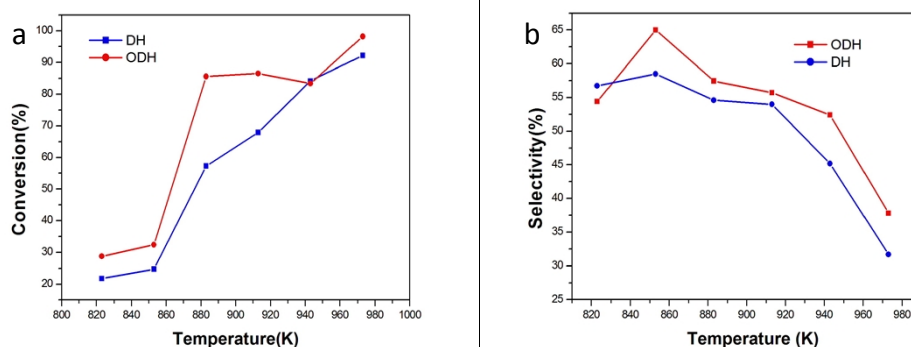

**Figure S7** Isobutane conversion (a) and the Isobutene selectivity (b) of i-C<sub>4</sub>H<sub>10</sub> as a function of temperature in oxidative dehydrogenation (ODH) and direct dehydrogenation (DH) reactions.

**Table S1** BET specific surface area of hollow Cr<sub>2</sub>O<sub>3</sub> and commercial Cr<sub>2</sub>O<sub>3</sub> nanoparticle

| Sample                                         | Total (BET) specific surface area (m <sup>2</sup> /g) |
|------------------------------------------------|-------------------------------------------------------|
| Cr <sub>2</sub> O <sub>3</sub> -203            | 102.64                                                |
| Cr <sub>2</sub> O <sub>3</sub> -284            | 86.58                                                 |
| Cr <sub>2</sub> O <sub>3</sub> -396            | 53.06                                                 |
| Cr <sub>2</sub> O <sub>3</sub> -510            | 28.72                                                 |
| commercial nano Cr <sub>2</sub> O <sub>3</sub> | 31.63                                                 |
